# Supplementary material for: Green Method for the Selective Electromembrane Extraction of Parabens and Fluoroquinolones in the Presence of NSAIDs by Using Biopolymeric Chitosan Films
Source: MDPI journal article supplement (doi:10.3390/membranes13030326), 2023-03-12
Supplement: s1 [file s1]

# Green Method for the Selective Electromembrane Extraction of Parabens and Fluoroquinolones in the Presence of NSAIDs by Using Biopolymeric Chitosan Films

Cristina Román-Hidalgo <sup>1</sup>, María Jesús Martín-Valero <sup>1,\*</sup>, Germán López-Pérez <sup>2</sup> and Mercedes Villar-Navarro <sup>1,\*</sup>

<sup>1</sup> Department of Analytical Chemistry, Faculty of Chemistry, Universidad de Sevilla, c/Prof. García González, s/n. 41012-Seville, Spain;

<sup>2</sup> Department of Physical Chemistry, Faculty of Chemistry, Universidad de Sevilla, c/Prof. García González, s/n. 41012-Seville, Spain;

\* Correspondence: mmartin@us.es (M.J.M.-V.); mvn@us.es (M.V.-N.); Tel.: +34-954556308 (M.J.M.-V.); +34-954557172 (M.V.-N.)

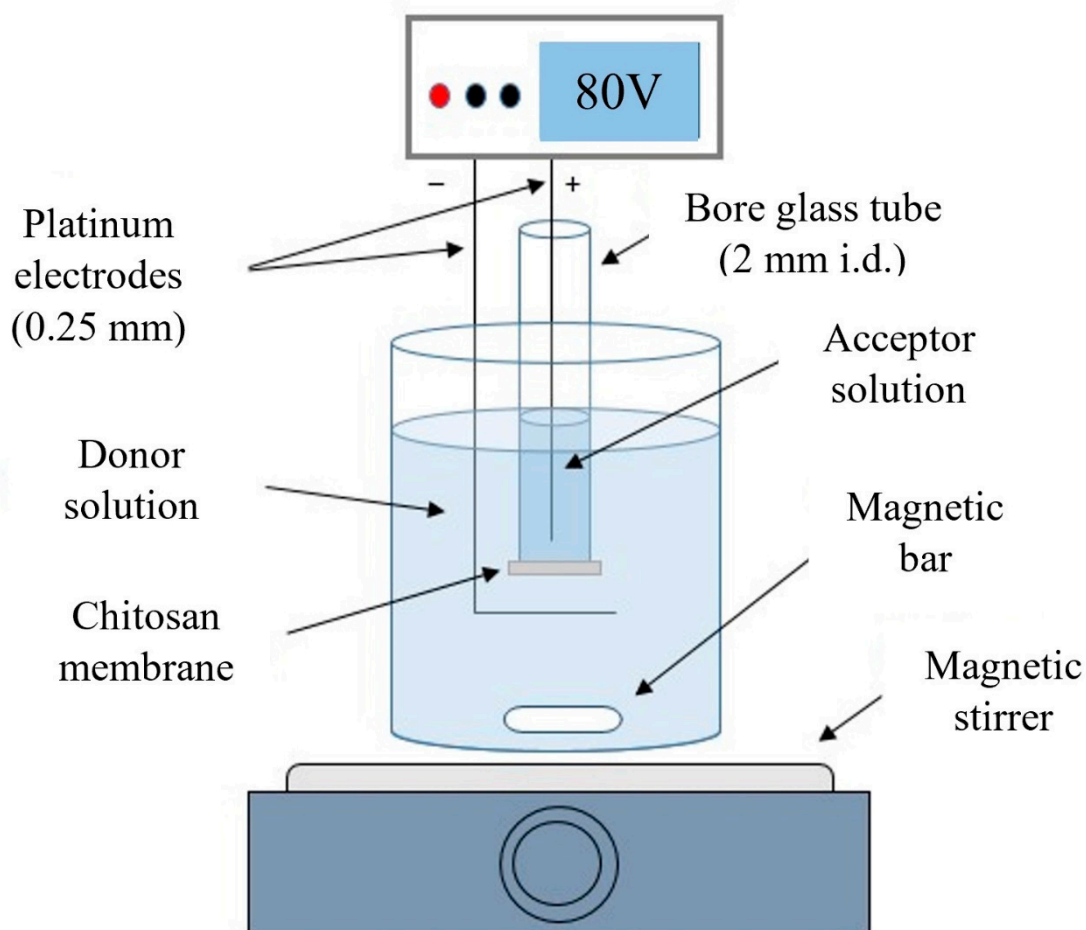

Figure S1. EME device.

**Table S1.** Gradient conditions for the chromatographic analysis. A: 28mM aqueous phosphate buffer pH 2.5; B: Methanol.

| t (min) | %A | %B |
|---------|----|----|
| 0       | 55 | 45 |
| 2       | 50 | 50 |
| 5       | 50 | 50 |
| 6       | 45 | 55 |
| 10      | 45 | 55 |
| 14      | 40 | 60 |
| 22      | 40 | 60 |
| 23      | 15 | 85 |
| 25      | 15 | 85 |

**Table S2.** Chemical structures and pKa values of target analytes.

| Analyte | Chemical Structure                                                                   | pKa  |
|---------|--------------------------------------------------------------------------------------|------|
| MeP     | 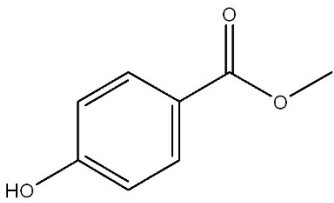   | 8.17 |
| EtP     |   | 8.22 |
| iPrP    |  | 8.4  |
| PrP     |  | 8.35 |
| BzP     |  | 8.18 |
| iBuP    |  | 8.17 |

|     |                                                                                      |           |
|-----|--------------------------------------------------------------------------------------|-----------|
| BuP | 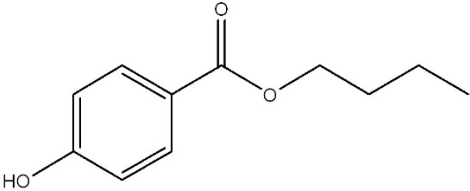   | 8.37      |
| MBR |    | 5.7; 8.9  |
| ENR |    | 7.9; 6.2  |
| FLM |   | 6.5       |
| SAL |  | 2.3; 13.4 |
| KTP |  | 4.23      |
| NAX |  | 4.84      |
